# Supplementary material for: Analysis of the Clinicopathological Characteristics, Prognosis, and Lymphocyte Infiltration of Esophageal Neuroendocrine Neoplasms: A Surgery-Based Cohort and Propensity-Score Matching Study
Source: MDPI journal article supplement (doi:10.3390/cancers15061732), 2023-03-13
Supplement: s1 [file s1]

Supplementary Materials

# Analysis of the Clinicopathological Characteristics, Prognosis, and Lymphocyte Infiltration of Esophageal Neuroendocrine Neoplasms: A Surgery-Based Cohort and Propensity-Score Matching Study

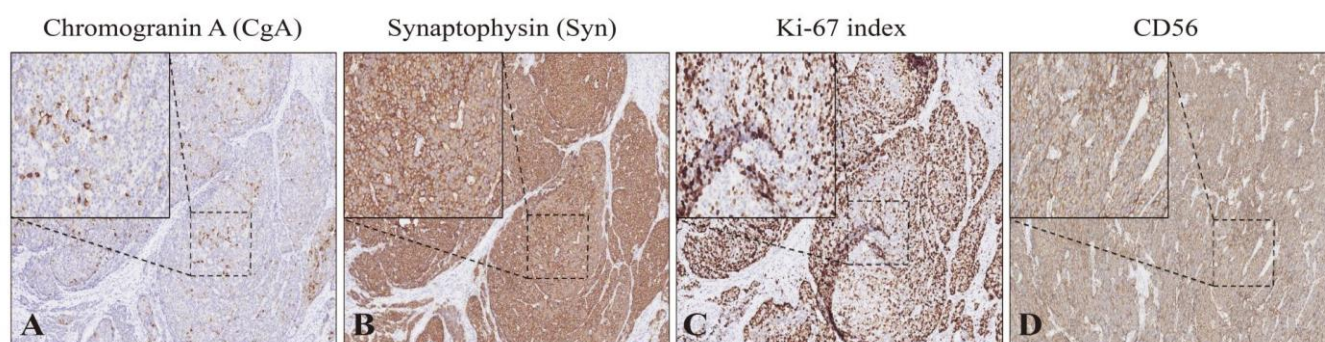

**Figure S1.** The specific tumor markers for E-NENs under a 400× high-power field. (A. Chromogranin A; B. Synaptophysin; C. CD-56; D. Ki-67 expression).

**Table S1.** The information of products and reagents related the study.

| Products                   | Information                           | Remarks                                                                                                                                                                        |
|----------------------------|---------------------------------------|--------------------------------------------------------------------------------------------------------------------------------------------------------------------------------|
| CD4 antibodies             | AB133616, Abcam, Cambridge, UK        | The anti-CD4 and anti-CD8 antibodies were diluted by 3% Bovine Serum Albumin (BSA) solution with a ratio of 1 to 400, while anti-CD20 antibodies' dilution ratio was 1 to 1000 |
| CD8 antibodies             | 85336, Cell Signaling Technology, USA |                                                                                                                                                                                |
| CD20 antibodies            | AB78237, Abcam, Cambridge, UK         |                                                                                                                                                                                |
| Diaminobenzidine chromogen | CR2204077, Servicebio, CHN            |                                                                                                                                                                                |
| Haematoxylin               | GK500710, GeneTech(Shanghai), CHN     |                                                                                                                                                                                |
| Eosin                      | CR2101102, Servicebio, CHN            |                                                                                                                                                                                |

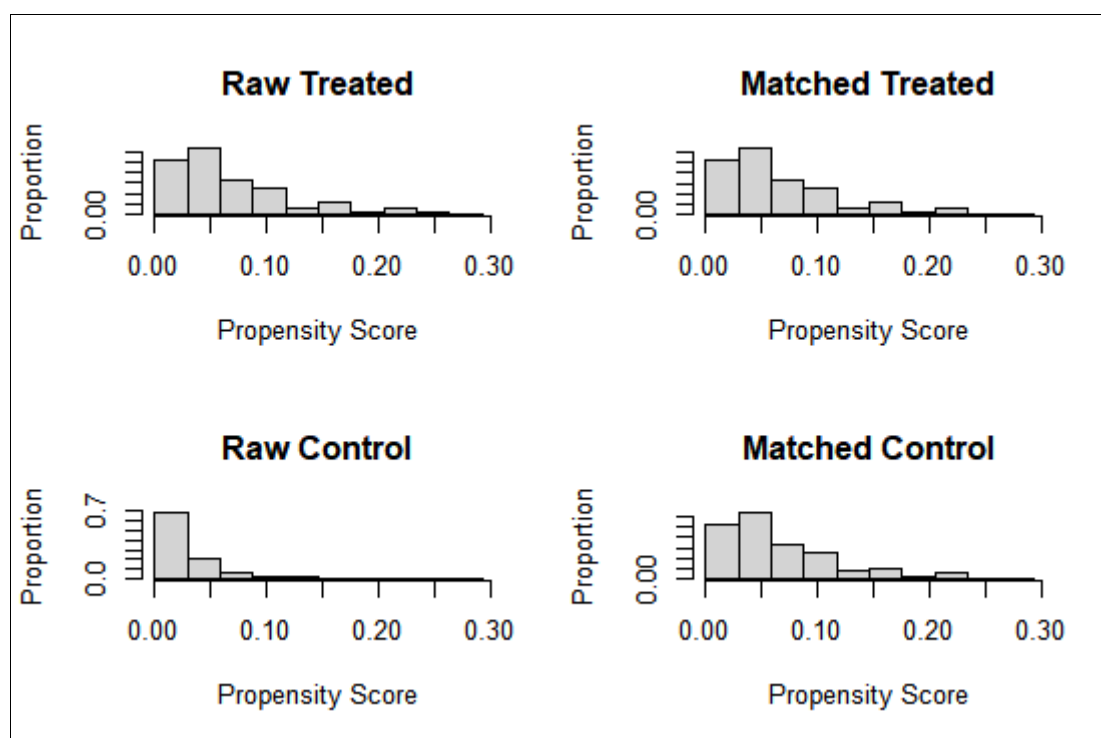

**Figure S2.** Standardized bias across covariates between ESCC and E-NECs has been well balanced after matching. Variables used for matching included age, tumor location, T status, N status, differentiation, LVI, neoadjuvant and adjuvant therapy. Abbreviations: LVI, lymphovascular invasion; T status and N status were both included pathological category [pT, pN, pStage] and category after neoadjuvant therapy [ypT, ypN, ypStage].

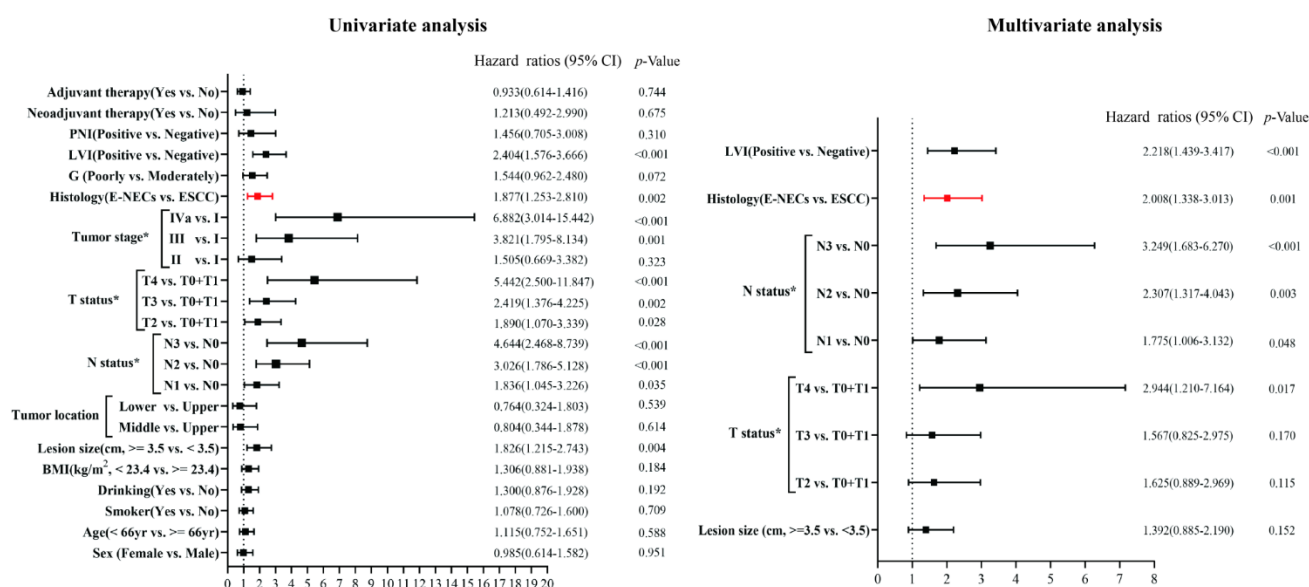

**Figure S3.** Univariate and multivariate analysis of variables associated with overall survival after matching<sup>#</sup>. Abbreviations: G, tumor differentiation; ESCC, esophageal squamous cell carcinoma; E-NECs, esophageal neuroendocrine carcinomas; OS, overall survival; BMI, body mass index; LVI, lymphovascular invasion; PNI, perineural invasion. \*Both T status, N status, and tumor stage included the pathological category (pT, pN, pStage) and the category (ypT, ypN, ypStage) after neoadjuvant therapy. <sup>#</sup> The hazard ratios for OS were calculated based on the cohort excluding the 3-cases NET.

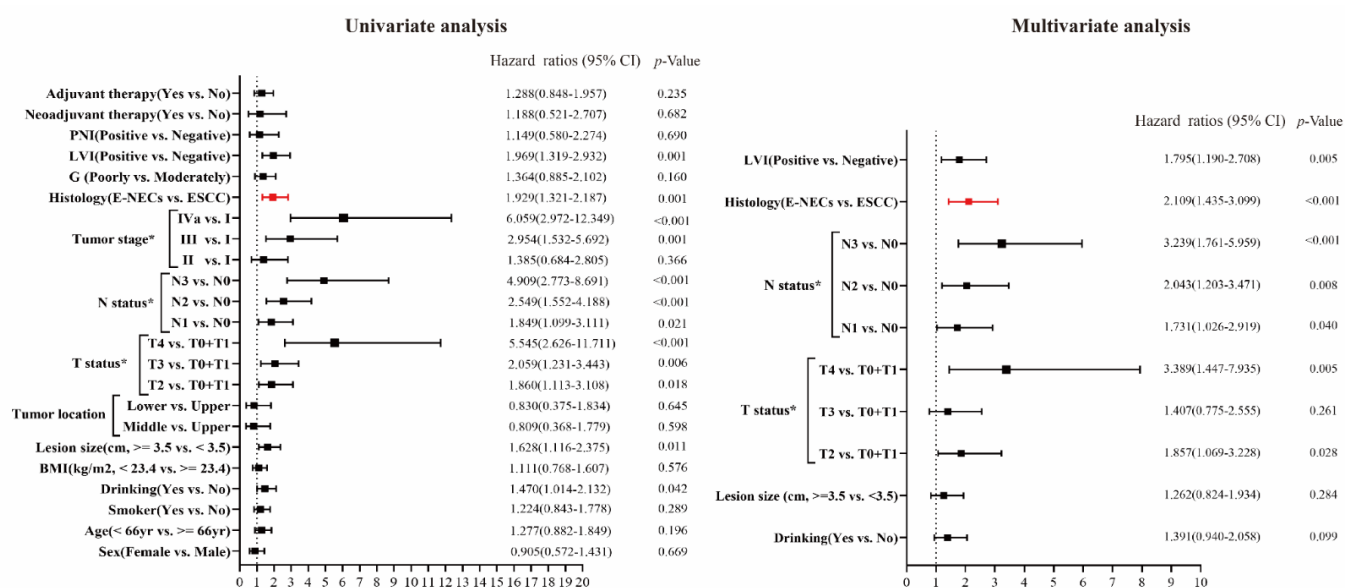

**Figure S4.** Univariate and multivariate analysis of variables related to recurrence-free survival after matching<sup>#</sup>. Abbreviations: G, tumor differentiation; ESCC, esophageal squamous cell carcinoma; E-NECs, esophageal neuroendocrine carcinomas; RFS, recurrence-free survival; BMI, body mass index; LVI, lympho-vascular invasion; PNI, perineural invasion. \*Both T status, N status, and tumor stage included the pathological category (pT, pN, pStage) and the category (ypT, ypN, ypStage) after neoadjuvant therapy. <sup>#</sup> The hazard ratios for RFS were calculated based on the cohort excluding the 3-cases NET.
